# Supplementary material for: The Cdc14 Phosphatase Controls Resolution of Recombination Intermediates and Crossover Formation during Meiosis
Source: Int J Mol Sci. 2021 Sep 10;22(18):9811. doi: 10.3390/ijms22189811 (PMC8470964; doi:10.3390/ijms22189811)
Supplement: Supplementary file 1 [file ijms-22-09811-s001.zip]

Archive with 5 entries (5 files):
- ijms-1368721-supplementary.pdf
- Video S1.mov
- Video S2.mov
- Video S3.avi
- Video S4.avi
